# Supplementary material for: Neurological Complications of COVID-19 and Possible Neuroinvasion Pathways: A Systematic Review
Source: PubMed Central journal article supplement (PMC7558767; doi:10.3390/ijerph17186688), 2020-09-14
Supplement: ijerph-17-06688-s001.pdf [file ijerph-17-06688-s001.pdf]

**Table S1.** Studies concerning COVID-19 effects on the Central Nervous System.

| Article                       | Study design        | Sample            | Age          | Country              | Neurological Complications                                                                                                                                                                                      | Prior Medical Conditions                                                                                                                                                                                                                                                              |
|-------------------------------|---------------------|-------------------|--------------|----------------------|-----------------------------------------------------------------------------------------------------------------------------------------------------------------------------------------------------------------|---------------------------------------------------------------------------------------------------------------------------------------------------------------------------------------------------------------------------------------------------------------------------------------|
| Al-Saiegh et al., (2020) [20] | Case report         | N=2<br>M=1<br>F=1 | M=31<br>F=62 | USA                  | -Patient 1: H&H grade 3 aneurysmal SAH<br><br>-Patient 2: ischemic stroke with massive hemorrhagic conversion<br><br>-Both patients' conditions evolved into hydrocephalus, but CSF was negative for SARS-CoV-2 | None                                                                                                                                                                                                                                                                                  |
| Al-olama et al., (2020) [21]  | Case report         | N=1<br>M          | 36           | United Arab Emirates | -Meningoencephalitis complicated by intracerebral hematoma and subdural hematoma<br><br>-CSF proved positive for SARS-CoV-2                                                                                     | None                                                                                                                                                                                                                                                                                  |
| Avula et al., (2020) [64]     | Retrospective study | N=4<br>M=1<br>F=3 | 81           | USA                  | Acute stroke                                                                                                                                                                                                    | Patient 1: hypertension, dyslipidemia, carotid stenosis<br><br>Patient 2: frequent urinary tract infections, hypertension, hyperlipidemia, diabetes mellitus type 2, neuropathy<br><br>Patient 3: hypertension<br><br>Patient 4: hypertension, chronic kidney disease, hyperlipidemia |

|                                   |             |                   |      |       |                                                                                                                                                                                                                                                                                                                                                                                                                                                                                                                                                     |                                                                                                                                                                                                                                                                            |
|-----------------------------------|-------------|-------------------|------|-------|-----------------------------------------------------------------------------------------------------------------------------------------------------------------------------------------------------------------------------------------------------------------------------------------------------------------------------------------------------------------------------------------------------------------------------------------------------------------------------------------------------------------------------------------------------|----------------------------------------------------------------------------------------------------------------------------------------------------------------------------------------------------------------------------------------------------------------------------|
|                                   |             |                   |      |       |                                                                                                                                                                                                                                                                                                                                                                                                                                                                                                                                                     | Patient 1: diabetes mellitus type 2, former smoker, obesity                                                                                                                                                                                                                |
|                                   |             |                   |      |       |                                                                                                                                                                                                                                                                                                                                                                                                                                                                                                                                                     | Patient 2: None                                                                                                                                                                                                                                                            |
|                                   |             |                   |      |       |                                                                                                                                                                                                                                                                                                                                                                                                                                                                                                                                                     | Patient 3: hypertension, diabetes mellitus type 2, hypertensive heart disease, asthma                                                                                                                                                                                      |
| Barrios-López et al., (2020) [22] | Case report | N=4<br>M=2<br>F=2 | 71.5 | Spain | -Patient 1: stroke in the distal territory of the left MCA<br><br>-Patient 2: stroke in the distal portion of the left superior cerebellar artery and left posterior cerebral artery<br><br>-Patient 3: subacute ischemic stroke in the right hemisphere<br><br>-Patient 4: Right hemisphere stroke with occlusion of the MCA                                                                                                                                                                                                                       | Patient 4: hypertension, diabetes mellitus type 2, permanent atrial fibrillation, ischemic heart disease                                                                                                                                                                   |
| Beyrouti et al., (2020) [24]      | Case report | N=6<br>F=1<br>M=5 | 69.2 | UK    | -Patient 1: extensive acute posterior cerebral artery territory infarction with consequent bilateral incoordination and right homonymous hemianopia<br><br>-Patient 2: acute large left cerebellar and right parieto-occipital infarcts with consequent confusion, incoordination and drowsiness<br><br>-Patient 3: left posterior cerebral artery occlusion and infarction with consequent dysarthria and right hemiparesis<br><br>-Patient 4: acute right striatal infarct manifesting with dysarthria, left facial droop and left-sided weakness | Patient 1 and 6: none<br><br>Patient 2: Hypertension, diabetes, mitral valve replacement, atrial fibrillation, heart failure with a permanent pacemaker<br><br>Patient 3: Hypertension, hypercholesterolemia, atrial fibrillation, ischemic heart disease, prostate cancer |

|                                        |                    |                                                                             |                                   |       |                                                                                                                                                                                                                                                                                                                                                                                                                                                                                                                                                   |                                                                                                                                                                                                                                                                                                                                                            |
|----------------------------------------|--------------------|-----------------------------------------------------------------------------|-----------------------------------|-------|---------------------------------------------------------------------------------------------------------------------------------------------------------------------------------------------------------------------------------------------------------------------------------------------------------------------------------------------------------------------------------------------------------------------------------------------------------------------------------------------------------------------------------------------------|------------------------------------------------------------------------------------------------------------------------------------------------------------------------------------------------------------------------------------------------------------------------------------------------------------------------------------------------------------|
|                                        |                    |                                                                             |                                   |       | <p>-Patient 5: thrombotic occlusion of a branch of the right middle cerebral artery with dysarthria and left hemiparesis</p> <p>-Patient 6: thrombus in the basilar artery, bilateral P2 segment stenosis and multiple acute infarcts with consequent dysphasia and right hemiparesis</p>                                                                                                                                                                                                                                                         | <p>Patient 4: hypertension, previous stroke and high body mass index</p> <p>Patient 5: hypertension, diabetes, ischemic heart disease, heavy smoking and alcohol consumption</p>                                                                                                                                                                           |
| Beltrán-Corbellini et al., (2020) [81] | Case-control study | <p>N= 79</p> <p>M=48</p> <p>F=31</p> <p>CG= 40</p> <p>M=19</p> <p>F= 21</p> | <p>61.6±17.4</p> <p>61.1±17.1</p> | Spain | <p>-31 STDs among cases and 8 among controls were found</p> <p>-COVID-19 patients with new-onset STDs were younger than COVID-19 patients without STDs</p>                                                                                                                                                                                                                                                                                                                                                                                        | None                                                                                                                                                                                                                                                                                                                                                       |
| Benger et al., (2020) [23]             | Case report        | <p>N=5</p> <p>M=3</p> <p>F=2</p>                                            | 52.2                              | UK    | <p>-Patient 1: left frontal intracerebral hemorrhage with drowsy and right-sided hemiplegia</p> <p>-Patient 2: right frontal lobe intracerebral hemorrhage with dysarthria and left sided hemiparesis</p> <p>-Patient 3: right frontal lobe intracerebral hemorrhage</p> <p>-Patient 4: subacute right-sided gangliocapsular intracerebral hemorrhage</p> <p>-Patient 5: subacute intracerebral hemorrhage in the right perirolandic region with smaller petechial haemorrhages in the left paramedian frontal lobe and left cingulate sulcus</p> | <p>Patient 1: hypertension and type 2 diabetes mellitus</p> <p>Patient 2: multiple deep vein thrombosis, pulmonary embolism, hypertension and type 2 diabetes mellitus</p> <p>Patient 3: hypertension</p> <p>Patient 4: none</p> <p>Patient 5: ischemic heart disease, quiescent untreated multiple sclerosis, asthma, hypertension and hyperlipidemia</p> |

|                              |                                |                                 |                  |             |                                                                                                                                                                            |                                                                                                                        |
|------------------------------|--------------------------------|---------------------------------|------------------|-------------|----------------------------------------------------------------------------------------------------------------------------------------------------------------------------|------------------------------------------------------------------------------------------------------------------------|
| Carignan et al., (2020) [82] | Age-matched case-control study | N=134<br>M=64<br>F=70<br>CG=134 | 57.1 (42.6–64.4) | Canada      | -69 patients exhibited anosmia and 85 patients showed dysgeusia<br><br>-frequency of STDs was higher among COVID-19 patients as compared to CG                             | N.A.                                                                                                                   |
| Co et al., (2020) [25]       | Case report                    | N=1<br>F                        | 62               | Philippines | Ischemic stroke with hypodensity in the left semioval centre and corona radiata and stenosis of the MCA, presenting with dysarthria and upper and lower extremity weakness | Hypertension, diabetes, dyslipidemia, transient ischemic attack                                                        |
| Craen et al., (2020) [26]    | Case report                    | N=1<br>F                        | 66               | Usa         | Subarachnoid haemorrhage manifesting with altered mental status                                                                                                            | Diabetes, hypertension and hyperlipidemia                                                                              |
| Deliwala et al., (2020) [27] | Case report                    | N=1<br>F                        | 31               | USA         | Cortical stroke in the region of MCA                                                                                                                                       | None                                                                                                                   |
| Dell'Era et al., (2020) [84] | Cross-sectional study          | N=355<br>M=192<br>F=163         | 50.5 (40-59.5)   | Italy       | -249 patients reported STDs<br><br>-31 patients showed symptoms at the onset of COVID-19                                                                                   | Cardiac comorbidities (N=42)<br><br>Respiratory comorbidities (N=40)<br><br>Allergic/nasosinusual comorbidities (N=38) |
| Duong et al., (2020) [28]    | Case report                    | N=1<br>F                        | 41               | USA         | Meningoencephalitis manifesting with hallucinations and disorientation                                                                                                     | Obesity, diabetes                                                                                                      |
| Fasano et al., (2020) [29]   | Case report                    | N=1<br>M                        | 54               | Italy       | Focal motor seizure                                                                                                                                                        | None                                                                                                                   |
| Filatov et al., (2020) [30]  | Case report                    | N=1<br>M                        | 74               | USA         | Encephalopathy and epileptiform discharges in the right temporal region manifesting with inability to speak and follow commands                                            | Atrial fibrillation, cardioembolic stroke,                                                                             |

|                                |                       |                       |              |        |                                                                                                                                                                                                                                                                                              |                                                                                                   |
|--------------------------------|-----------------------|-----------------------|--------------|--------|----------------------------------------------------------------------------------------------------------------------------------------------------------------------------------------------------------------------------------------------------------------------------------------------|---------------------------------------------------------------------------------------------------|
|                                |                       |                       |              |        |                                                                                                                                                                                                                                                                                              | Parkinson's disease, COPD and recent cellulitis                                                   |
| Flamand et al., (2020) [31]    | Case report           | N=1<br>F              | 80           | France | Triphasic waves in EEG                                                                                                                                                                                                                                                                       | N.A.                                                                                              |
| Franceschi et al., (2020) [32] | Case report           | N=2<br>M=1<br>F=1     | 48 M<br>67 F | USA    | PRES                                                                                                                                                                                                                                                                                         | Patient 1: obesity<br>Patient 2: hypertension, diabetes, coronary artery disease, gout and asthma |
| Frisullo et al., (2020) [33]   | Case report           | N=1<br>F              | 49           | Italy  | Two small acute brain infarctions in the right perirolandic cortex                                                                                                                                                                                                                           | N.A.                                                                                              |
| Gane et al., (2020) [34]       | Case report           | N=1<br>M              | 48           | UK     | Anosmia                                                                                                                                                                                                                                                                                      | None                                                                                              |
| Garaci et al., (2020) [35]     | Case report           | N=1<br>F              | 44           | Italy  | Thrombosis of the superior vena cava, pulmonary artery and deep intracerebral venous thrombosis                                                                                                                                                                                              | None                                                                                              |
| Giacomelli et al., (2020) [85] | Cross-sectional study | N=59<br>M=40<br>F= 18 | 60 (50-74)   | Italy  | 20 patients with STDs were found:<br>-91% of dysgeusia symptoms occurred before hospitalization<br>-31 were females<br>-12 patients showed STDs as onset symptoms<br>-8 patients exhibited symptoms after hospitalization<br>-Mean age was 56<br>-An association between disorders was found | N.A.                                                                                              |

|                                 |                     |                    |      |        |                                                                                                                                                                                                                                                                |                                                                                                    |
|---------------------------------|---------------------|--------------------|------|--------|----------------------------------------------------------------------------------------------------------------------------------------------------------------------------------------------------------------------------------------------------------------|----------------------------------------------------------------------------------------------------|
|                                 |                     |                    |      |        | -Females were more affected by both smell and taste disorders                                                                                                                                                                                                  |                                                                                                    |
| Gilani et al., (2020) [36]      | Case report         | N=8<br>M=2<br>F=6  | 35.4 | Iran   | Onset olfactory and taste loss                                                                                                                                                                                                                                 | Rhinoplasty (N=3)                                                                                  |
| Goldberg et al., (2020) [37]    | Case report         | N=1<br>M           | 64   | USA    | Cerebral edema and infarcts of the right MCA and bilateral ACA territories manifesting with left-sided hemiparesis                                                                                                                                             | Hypertension, aplastic anemia, splenectomy.                                                        |
| Haddadi et al., (2020) [38]     | Case report         | N=1<br>F           | 54   | Iran   | Bilateral subacute hemorrhage in basal ganglia and altered mental status                                                                                                                                                                                       | Diabetes, hypertension, lumbar spinal laminectomy and fusion surgery                               |
| Hayashi et al., (2020) [39]     | Case report         | N=1<br>M           | 75   | Japan  | Hyperintensity in the splenium of corpus callosum, suggesting mild encephalitis/encephalopathy with a reversible splenial lesion                                                                                                                               | Mild Alzheimer's disease                                                                           |
| Helms et al., (2020) [74]       | Observational study | N=58<br>(sex N.A.) | 63   | France | Neurologic signs:<br>-Agitation (N=40)<br>-Confusion (N=26)<br>-Corticospinal tract signs (N=39)<br>-Dysexecutive syndrome (N=14)<br><br>Brain MRI:<br>-Perfusion abnormalities (N=11)<br>-Leptomeningeal enhancement (N=8)<br>-Cerebral ischemic stroke (N=3) | Neurologic disorders (N=7): transient ischemic attack, partial epilepsy, mild cognitive impairment |
| Hjelmeseth & Skaare (2020) [40] | Case report         | N=2<br>M=1<br>F=1  | 60   | Norway | -F: anosmia<br>-M: ageusia<br><br>(only symptoms)                                                                                                                                                                                                              | M: Billroth II surgery for gastric ulcers and atrial fibrillation                                  |

|                                |                            |                                                                      |                    |         |                                                                                                                                                                                                                                             |                                                                                                                                                                        |
|--------------------------------|----------------------------|----------------------------------------------------------------------|--------------------|---------|---------------------------------------------------------------------------------------------------------------------------------------------------------------------------------------------------------------------------------------------|------------------------------------------------------------------------------------------------------------------------------------------------------------------------|
| Hopkins et al., (2020) [75]    | Observational cohort study | N=382<br>M=97<br>F=285                                               | 40-49              | UK      | -330 had complete anosmia<br>-44 had severe loss of smell                                                                                                                                                                                   | N.A.                                                                                                                                                                   |
| Hornuss et al., (2020) [83]    | Case-control study         | N=45<br>F=20<br>M=25<br>CG=45                                        | 56±16.9<br>54±18.3 | Germany | -Anosmia (N=18)<br>-Hyposmia (N=20)<br>-Normosmia (N=7)                                                                                                                                                                                     | N.A                                                                                                                                                                    |
| Kandemirli et al., (2020) [65] | Retrospective study        | N=235<br>M=21<br>F=6<br>(sex referred to patients who underwent MRI) | 63 (34-87)         | Turkey  | 50 patients developed neurologic symptoms, 27 of whom did MRI in 12 patients MRI showed abnormalities:<br>-10 had cortical FLAIR signal abnormality<br>-2 had acute transverse sinus thrombosis and acute infarction in right MCA territory | 12 with abnormal MRI: hypertension (6), coronary artery disease (1), atrial fibrillation (1), Addison's disease (1), diabetes mellitus (5), chronic kidney disease (1) |
| Kadono et al., (2020) [41]     | Case report                | N=1<br>M                                                             | 44                 | Japan   | Seizures and brain edema                                                                                                                                                                                                                    | Cerebral venous thrombosis with acute hemorrhagic infarction and epilepsy                                                                                              |
| Karadaş et al., (2020) [78]    | Prospective study          | N=239<br>M=133<br>F=106                                              | 46.46±15.41        | Turkey  | 83 patients displayed neurologic symptoms:<br>-headache (N=64)<br>-impaired consciousness (N=23)<br>-dizziness (N=16)<br>-cerebrovascular disorders (9)                                                                                     | N.A.                                                                                                                                                                   |

|                                |                                       |                                    |                      |                                     |                                                                                                                                                                                                                                                                        |                                                                                                                                                                                                                                                                                                                       |
|--------------------------------|---------------------------------------|------------------------------------|----------------------|-------------------------------------|------------------------------------------------------------------------------------------------------------------------------------------------------------------------------------------------------------------------------------------------------------------------|-----------------------------------------------------------------------------------------------------------------------------------------------------------------------------------------------------------------------------------------------------------------------------------------------------------------------|
| Kaya et al.,<br>(2020) [42]    | Case report                           | N=1<br><br>M                       | 38                   | Turkey                              | Bilateral occipital and frontal cortical white matter<br><br>and splenium of corpus callosum<br>FLAIR hyperintensities and<br>DWI revealing vasogenic edema<br>similar to PRES manifesting with<br>cortical blindness, apathia and<br>inability to respond to commands | None                                                                                                                                                                                                                                                                                                                  |
| Kishfy et al.,<br>(2020) [43]  | Case report                           | N=2<br><br>M=1<br><br>F=1          | 58 M<br><br>67 F     | USA                                 | PRES                                                                                                                                                                                                                                                                   | Patient 1:<br>hyperlipidemia<br><br>Patient 2: hypertension,<br>obesity, type 2 diabetes<br>mellitus                                                                                                                                                                                                                  |
| Lechien et al.,<br>(2020) [66] | Multicenter<br>Retrospective<br>study | N=417<br><br>M=154<br><br>F=263    | 36.9 ± 11.4          | Belgium,<br>France,<br>Spain, Italy | -357 had olfactory dysfunctions<br><br>-367 had gustatory dysfunctions                                                                                                                                                                                                 | Respiratory<br>insufficiency,<br>neurological diseases,<br><br>allergic rhinitis (more<br>than 15%), asthma<br>(almost 8%), high<br>blood pressure (more<br>than 6%),<br>hypothyroidism,<br>diabetes, CRS, renal<br>failure, hepatic<br>insufficiency, GERD,<br>heart problems,<br>depression,<br>autoimmune diseases |
| Lee et al.,<br>(2020) [79]     | Prospective<br>study                  | N=3191<br><br>M=1161<br><br>F=2030 | 44.0 (25.0-<br>58.0) | Korea                               | -Acute anosmia or ageusia was<br>detected in 15.3% patients in the<br>early phase of COVID-19 and in<br>15.7%<br>asymptomatic/paucisymptomatic<br>patients<br><br>-STDs were more common<br>among females and younger<br>individuals                                   | Hypertension, diabetes<br>mellitus, cancer, end-<br>stage renal failure,<br>chronic lung diseases,<br>congestive heart<br>failure, cardiac diseases<br>without congestive<br>heart failure                                                                                                                            |



|                                |                     |                         |               |       | -Most patients with STDs recovered within 3 weeks                                                                                                                                                                                                                                  |                                                                                                                                                                                |
|--------------------------------|---------------------|-------------------------|---------------|-------|------------------------------------------------------------------------------------------------------------------------------------------------------------------------------------------------------------------------------------------------------------------------------------|--------------------------------------------------------------------------------------------------------------------------------------------------------------------------------|
| Lu et al., (2020) [67]         | Retrospective study | N=304<br>M=182<br>F=122 | 44 (33-59.25) | China | encephalopathy (N=8); seizure-like events (N=2); systemic or direct brain insults (N=84) (probably due to hypoxia N=77)                                                                                                                                                            | Acute cerebrovascular disease, TBI, CNS infection, hypoxia, shock, sepsis, multiple organ dysfunction, hyperglycemia, hypoglycemia, hyponatremia, hypocalcemia, hypomagnesemia |
| Manganelli et al., (2020) [44] | Case report         | N=3<br>M=1<br>F=2       | 60            | Italy | -Patient 1 and 2: severe brainstem lesion<br><br>-Patient 3: punctiform gliotic foci in right pons                                                                                                                                                                                 | N.A.                                                                                                                                                                           |
| Mao et al., (2020) [68]        | Retrospective study | N=214<br>M=87<br>F=127  | 52.7±15.15    | China | -Neurologic manifestations (N=78): dizziness (N=36), headache (N=28), impaired consciousness (N=16), acute cerebrovascular disease (N=6), ataxia (N=1), seizure (N=1)<br><br>-Patients with severe infection were older and with pre-existing pathologies, especially hypertension | Hypertension (51), diabetes (N=30), cardiac/cerebrovascular disease (N=15), malignancy (N=13), chronic kidney disease (N=6)                                                    |
| Mawhinney et al., (2020) [45]  | Case report         | N=1<br>M                | 41            | UK    | Acute mania                                                                                                                                                                                                                                                                        | Congenital nystagmus                                                                                                                                                           |
| Melley et al., (2020) [46]     | Case report         | N=1<br>F                | 59            | USA   | Loss of appetite, dysgeusia, anosmia                                                                                                                                                                                                                                               | Hypertension, hyperlipidemia, asthma                                                                                                                                           |

|                               |                     |                   |            |         |                                                                                                                                                                                                                                                                                                                            |                                                                     |
|-------------------------------|---------------------|-------------------|------------|---------|----------------------------------------------------------------------------------------------------------------------------------------------------------------------------------------------------------------------------------------------------------------------------------------------------------------------------|---------------------------------------------------------------------|
| Morassi et al., (2020) [69]   | Retrospective study | N=6<br>M=5<br>F=1 | 69 (57-82) | Italy   | 4 patients had ischemic strokes (3 died and 1 subject remained neurologically impaired) and 2 patients had hemorrhagic strokes (death)                                                                                                                                                                                     | Vascular risk factors, except for one patient                       |
| Moriguchi et al., (2020) [16] | Case report         | N=1<br>M          | 24         | Japan   | -DWI revealed hyperintensity of right lateral ventricle and FLAIR images showed hyperintense signal changes in the right mesial temporal lobe and hippocampus with slight hippocampal atrophy, manifesting with transient generalized seizures and consciousness disturbance<br><br>-CSF was found positive for SARS-CoV-2 | N.A.                                                                |
| Muhammad et al., (2020) [47]  | Case report         | N=1<br>F          | 60         | Germany | -Left frontal aneurysmal subarachnoid haemorrhage from a ruptured pericallosal artery with loss of consciousness<br><br>-CSF was negative for SARS-CoV-2                                                                                                                                                                   | N.A.                                                                |
| Noro et al., (2020) [48]      | Case report         | N=1<br>F          | 35         | Brasil  | Intracranial hypertension with prominent subarachnoid space around optic nerves and superior compression of the hypophysis                                                                                                                                                                                                 | None                                                                |
| Ollarves-Carrero (2020) [49]  | Case report         | N=1<br>F          | 40         | Spain   | Anosmia                                                                                                                                                                                                                                                                                                                    | N.A.                                                                |
| Ottaviano et al., (2020) [50] | Case report         | N=6<br>(sex N.A.) | N.A.       | Italy   | -Hyposmia and hypogeusia<br><br>-Symptoms were still present in 1 subject after 15 days                                                                                                                                                                                                                                    | N.A.                                                                |
| Oxley et al., (2020) [51]     | Case report         | N=5<br>M=4<br>F=1 | 40.4       | USA     | Large-vessel ischemic stroke                                                                                                                                                                                                                                                                                               | Stroke (N=1), diabetes (N=1), hyperlipidemia and hypertension (N=1) |

|                                    |                     |                     |              |        |                                                                                                                                                                                                       |                                                                                                                                                            |
|------------------------------------|---------------------|---------------------|--------------|--------|-------------------------------------------------------------------------------------------------------------------------------------------------------------------------------------------------------|------------------------------------------------------------------------------------------------------------------------------------------------------------|
| Petrescu et al., (2020) [70]       | Retrospective study | N=36<br>M=27<br>F=9 | 43-97        | France | EEG abnormalities in 42.5% of patients:<br>-10% moderate<br>-20% severe<br>-12.5% critical                                                                                                            | No comorbidities in 2 patients. The others had past medical history of hypertension, diabetes mellitus, cardiomyopathy, renal failure and dementia, mostly |
| Poyiadji et al., (2020) [17]       | Case report         | N=1<br>F            | late fifties | USA    | MRI showed lesions within the bilateral thalami, medial temporal lobes and subinsular regions manifesting with altered mental status: the patient was diagnosed with acute necrotizing encephalopathy | N.A.                                                                                                                                                       |
| Radmanesh et al., (2020) [71]      | Retrospective study | N=11<br>M=9<br>F= 2 | 53 (38-64)   | USA    | 4 patients exhibited diffuse leukoencephalopathy, 1 exhibited microhemorrhages and 6 patients exhibited both                                                                                          | Hypertension, hyperlipidemia, type II diabetes, coronary artery disease, atrial fibrillation, gastrointestinal, deep vein thrombosis, cocaine use          |
| Reichard et al., (2020) [52]       | Case report         | N=1<br>M            | 71           | USA    | Acute disseminated encephalomyelitis and neocortical microinfarcts                                                                                                                                    | Ischemic heart disease due to coronary artery atherosclerosis                                                                                              |
| Rogg et al., (2020) [53]           | Case report         | N=1<br>M            | 59           | USA    | PRES                                                                                                                                                                                                  | None                                                                                                                                                       |
| Sharifi-Razavi et al., (2020) [54] | Case report         | N=1<br>M            | 79           | Iran   | Intracerebral hemorrhage in right hemisphere accompanied by intraventricular and subarachnoid haemorrhage manifesting with loss of consciousness and bilateral extensor plantar reflexes              | None                                                                                                                                                       |

|                             |                                    |                        |              |       |                                                                                                                                                                                   |                                                                                                                                                                                    |
|-----------------------------|------------------------------------|------------------------|--------------|-------|-----------------------------------------------------------------------------------------------------------------------------------------------------------------------------------|------------------------------------------------------------------------------------------------------------------------------------------------------------------------------------|
| Scullen et al., (2020) [72] | Retrospective study                | N=76<br>M=40<br>F=36   | 59.8 (35-91) | USA   | 27 patients had neurologic features:<br>-encephalopathy (N=20)<br>-vasculopathy (N=5)<br>-acute necrotizing encephalopathy (N=2)                                                  | Hypertension (N=48), diabetes mellitus type 2 (N=39), obesity (N=20) and chronic kidney disease (N=17)                                                                             |
| Shoskes et al., (2020) [55] | Case report                        | N=1<br>M               | 69           | USA   | Microhaemorrhages in corpus callosum, basal ganglia and brainstem                                                                                                                 | Hypertension, chronic kidney disease and hypothyroidism                                                                                                                            |
| Somani et al., (2020) [56]  | Case report                        | N=2<br>F               | 49 F<br>73 F | USA   | De novo status epilepticus                                                                                                                                                        | -Patient 1: rheumatoid arthritis, schizoaffective and conversion disorders<br><br>-Patient 2: hypertension, diabetes mellitus, chronic kidney disease and skull base encephalocele |
| Speth et al., (2020) [80]   | Prospective, cross-sectional study | N=103<br>M= 50<br>F=53 | 48.5±15.9    | USA   | -63 patients displayed STDs<br>-severity of anosmia correlated with severity of dysgeusia<br>-STDs negatively correlated with older age and positively correlated with female sex | Allergic rhinitis or hay fever (N=36), chronic rhinosinusitis or polyps (N=1), asthma (N=13)                                                                                       |
| Spinato et al., (2020) [73] | Retrospective study                | N=202<br>M=97<br>F=105 | 56 (20-89)   | Italy | -STDs (N=130)<br>-More frequent in women                                                                                                                                          | None (N=89)                                                                                                                                                                        |

|                             |                          |                         |           |        |                                                                                                                                                                                        |                                        |
|-----------------------------|--------------------------|-------------------------|-----------|--------|----------------------------------------------------------------------------------------------------------------------------------------------------------------------------------------|----------------------------------------|
| Tunç et al., (2020) [57]    | Case report              | N=4<br>M=2<br>F=2       | 45-77     | Turkey | Acute ischemic stroke                                                                                                                                                                  | Diabetes (N=1),<br>hypertension (N=3)  |
| Vaira et al., (2020a) [76]  | Observational study      | N=72<br>M=27<br>F=45    | 49.2±13.7 | Italy  | 53 patients reported STDs:<br>-30 patients had both anosmia and dysgeusia                                                                                                              | N.A.                                   |
| Vaira et al., (2020b) [77]  | Multicenter cohort study | N=345<br>M=146<br>F=199 | 48.5±12.8 | Italy  | 256 patients reported STDs:<br>-203 reported both anosmia and dysgeusia<br>-22 had isolated anosmia<br>-30 had isolated dysgeusia                                                      | N.A.                                   |
| Viguiet et al., (2020) [58] | Case report              | N=1<br>M                | 73        | France | Acute ischemic stroke complicating common carotid artery thrombosis manifesting with aphasia and right hemiparesis                                                                     | None                                   |
| Wong et al., (2020) [59]    | Case report              | N=1<br>M                | 40        | UK     | Inflammatory rhombencephalitis/myelitis manifesting with diplopia, oscillopsia, limb ataxia, altered sensation in right arm, hiccups when eating or drinking, unsteady gait, nystagmus | Closed angle glaucoma and hypertension |
| Ye et al., (2020) [60]      | Case report              | N=1<br>M                | N.A.      | China  | -Encephalitis<br>-CSF was negative for SARS-CoV-2                                                                                                                                      | N.A.                                   |
| Zanin et al., (2020) [61]   | Case report              | N=1<br>F                | 54        | Italy  | -Anosmia and ageusia<br>-Focal sensorimotor deficits<br>-Two seizures starting from right frontotemporal region and diffusing in homologous contralateral hemisphere                   | ACA aneurysm                           |

-Demyelinating lesions in periventricular white matter, bulbo-medullary junction and in both the cervical and dorsal spinal cord

-CSF was negative for SARS-CoV-2

Zhai et al., Case report N=1 79 China Ischemic stroke None  
(2020) [62] M

Zoghi et al., Case report N=1 M 21 Iran Encephalomyelitis N.A.  
(2020) [63]

Notes: ACA, anterior communicating artery; CG, control group; CNS, central nervous system; COPD, chronic obstructive pulmonary disease; COVID-19, coronavirus disease-19; CRS, chronic rhinosinusitis; CSF, cerebrospinal fluid; CT, computerized tomography; DWI, diffusion weighted imaging; EEG, electroencephalography; F, female; FLAIR, fluid-attenuated inversion recovery; GERD, gastroesophageal reflux disease; H&H, Hunt and Hess; M, male; MCA, middle cerebral artery; MRI, magnetic resonance imaging; N.A., not applicable; PRES, posterior reversible leukoencephalopathy syndrome; SAH, subarachnoid haemorrhage; SARS-CoV-2, Severe Acute Respiratory Syndrome-Coronavirus-2; STDs, smell and taste disorders; TBI, traumatic brain injury.

**Table 2.** Studies concerning COVID-19 effects on the Peripheral Nervous System.

| Article                       | Study design | Sample   | Age | Country     | Neurological Complications                                                                          | Prior Medical Conditions                             |
|-------------------------------|--------------|----------|-----|-------------|-----------------------------------------------------------------------------------------------------|------------------------------------------------------|
| Abdelnour et al., (2020) [86] | Case report  | N=1<br>M | 69  | UK          | Numbness on both legs, reduced muscular power, gait ataxia                                          | Hypertension, type 2 diabetes mellitus, mild COPD    |
| Alberti et al., (2020) [87]   | Case report  | N=1<br>M | 71  | Italy       | -Guillain-Barré syndrome<br>-CSF was found negative for SARS-CoV-2                                  | Hypertension, abdominal aortic aneurysm, lung cancer |
| Coen et al., (2020) [88]      | Case report  | N=1 M    | 70  | Switzerland | Acute inflammatory demyelinating polyneuropathy, the most common subtype of Guillain-Barré syndrome | None                                                 |

|                                     |                     |                         |              |        |                                                                                                                                                                                       |                                                                                                 |
|-------------------------------------|---------------------|-------------------------|--------------|--------|---------------------------------------------------------------------------------------------------------------------------------------------------------------------------------------|-------------------------------------------------------------------------------------------------|
| Dinkin et al., (2020) [89]          | Case report         | N=2<br>M<br>F           | 36 M<br>71 F | USA    | -Miller Fisher syndrome and ophthalmoparesis from cranial nerve palsy<br>-CSF was found negative for SARS-CoV-2                                                                       | M: infantile strabismus<br>F: hypertension                                                      |
| Farzi et al., (2020) [90]           | Case report         | N=1<br>M                | 41           | Iran   | Guillain-Barré syndrome                                                                                                                                                               | Type II diabetes mellitus                                                                       |
| Gutiérrez-Ortiz et al., (2020) [91] | Case report         | N=2<br>M<br>F           | 50 M<br>39 F | Spain  | -Miller Fisher syndrome and polyneuritis cranialis<br>-CSF was found negative for SARS-CoV-2                                                                                          | M: bronchial asthma<br>F: none                                                                  |
| Homma et al., (2020) [92]           | Case report         | N=1<br>F                | 35           | Japan  | Facial nerve palsy and olfactory disturbance                                                                                                                                          | None                                                                                            |
| Hutchins et al., (2020) [93]        | Case report         | N=1<br>M                | 21           | USA    | Guillain-Barré syndrome                                                                                                                                                               | Hypertension, diabetes and class I obesity                                                      |
| Karadaş et al., (2020) [78]         | Prospective study   | N=239<br>M=133<br>F=106 | 46.46±15.41  | Turkey | Trigeminal neuralgia (N=8), glossopharyngeal neuralgia (N=9), vagoglossopharyngeal neuralgia (N=2), muscle pain (N=36), restless leg syndrome (N=4) and Guillain-Barré syndrome (N=1) | N.A.                                                                                            |
| Lantos et al., (2020) [94]          | Case report         | N=1<br>M                | 36           | USA    | Miller Fisher syndrome                                                                                                                                                                | Left eye strabismus                                                                             |
| Mao et al., (2020) [68]             | Retrospective study | N=214<br>M=87<br>F=127  | 52.7±15.5    | China  | Neurologic symptoms (N=78): taste (N=12), smell (N=11); vision impairment (N=3); nerve pain (N=5); skeletal muscle pain (N=23)                                                        | Hypertension (N=51), diabetes (N=30), cardiac or cerebrovascular disease (N=15), cancer (N=13), |

|                                |             |                   |      |         |                                                                    |                                                                                      |
|--------------------------------|-------------|-------------------|------|---------|--------------------------------------------------------------------|--------------------------------------------------------------------------------------|
|                                |             |                   |      |         |                                                                    | chronic kidney disease (N=6)                                                         |
| Ottaviani et al., (2020) [95]  | Case report | N=1<br>F          | 66   | Italy   | -Guillain-Barré syndrome<br>-CSF was found negative for SARS-CoV-2 | N.A.                                                                                 |
| Padroni et al., (2020) [96]    | Case report | N=1<br>F          | 70   | Italy   | Guillain-Barré syndrome                                            | N.A.                                                                                 |
| Rana et al., (2020) [97]       | Case report | N=1<br>M          | 54   | USA     | Guillain-Barré syndrome                                            | Hypertension, hyperlipidemia, restless leg syndrome, chronic back pain               |
| Sedaghat & Karimi, (2020) [98] | Case report | N=1<br>M          | 65   | Iran    | Guillain-Barré syndrome                                            | N.A.                                                                                 |
| Scheidl et al., (2020) [99]    | Case report | N=1<br>F          | 54   | Germany | Guillain-Barré syndrome                                            | None                                                                                 |
| Toscano et al., (2020) [100]   | Case report | N=5<br>M=4<br>F=1 | 58.4 | Italy   | -Guillain-Barré syndrome<br>-CSF was found negative for SARS-CoV-2 | N.A.                                                                                 |
| Virani et al., (2020) [101]    | Case report | N=1<br>M          | 54   | USA     | Guillain-Barré syndrome                                            | N.A.                                                                                 |
| Webb et al., (2020) [102]      | Case report | N=1<br>M          | 57   | UK      | Guillain-Barré syndrome                                            | Untreated hypertension and psoriasis                                                 |
| Wei et al., (2020) [103]       | Case report | N=1<br>M          | 62   | China   | Oculomotor nerve palsy                                             | Alcohol and tobacco use, type II diabetes mellitus, hypertension, lacunar infarction |
| Zhao et al., (2020) [104]      | Case report | N=1<br>F          | 61   | China   | -Guillain-Barré syndrome<br>-CSF was found negative for SARS-CoV-2 | N.A.                                                                                 |



*Notes:* COPD, chronic obstructive pulmonary disease; CSF, cerebrospinal fluid; F, female; M, male; N.A., not applicable; SARS-CoV-2, Severe Acute Respiratory Syndrome-Coronavirus-2.
